# Supplementary material
Source: ML conference proceedings conference paper supplement (https://openreview.net/forum?id=WqsYs05Ri7)
Supplement: supplementary_material [file attachment]

# Appendix

## A MAXIMUM LIKELIHOOD ESTIMATION OF U-ACE PARAMETERS: $\lambda, \beta$

The posterior on weights shown in Equation 1 has two parameters:  $\lambda, \beta$  as shown below with  $C_X$  and  $Y$  are array of concept activations and logit scores (see Algorithm 1).

$$\vec{w} \sim \mathcal{N}(\mu, \Sigma) \quad \text{where } \mu = \Sigma^{-1}C_X Y, \quad \Sigma^{-1} = \beta C_X C_X^T + (\lambda \text{diag}(\epsilon \epsilon^T))^{-1}$$

We obtain the best values of  $\lambda$  and  $\beta$  that maximize the log-likelihood objective shown below.

$$\lambda^*, \beta^* = \arg \max_{\lambda, \beta} \mathbb{E}_Z \left[ -\frac{\beta^2 \|Y - (C_X + Z)^T \vec{w}(\lambda, \beta)\|^2}{2} + \log(\beta) \right]$$

where  $Z$  is uniformly distributed in the range given by error intervals

$$Z \sim \text{Unif}([-s(\mathbf{x}_1), -s(\mathbf{x}_2), \dots], [s(\mathbf{x}_1), s(\mathbf{x}_2), \dots])$$

We implement the objective using Pyro software library (Bingham et al., 2019) and Adam optimizer.

## B PROOF OF PROPOSITION 1

We restate the result for clarity.

For a concept  $k$  and  $\cos(\alpha_k)$  defined as  $\cos\text{-sim}(e(v_k, f, \mathcal{D}), e(w_k, g, \mathcal{D}))$ , we have the following result when concept activations in  $f$  for an instance  $\mathbf{x}$  are computed as  $\cos\text{-sim}(f(\mathbf{x}), v_k)$  instead of  $v_k^T f(\mathbf{x})$ .

$$\vec{m}(\mathbf{x})_k = \cos(\theta_k) \cos(\alpha_k), \quad \vec{s}(\mathbf{x})_k = \sin(\theta_k) \sin(\alpha_k)$$

where  $\cos(\theta_k) = \cos\text{-sim}(g_{\text{text}}(T_k), g(\mathbf{x}))$  and  $\vec{m}(\mathbf{x})_k, \vec{s}(\mathbf{x})_k$  denote the  $k^{\text{th}}$  element of the vector.

*Proof.* Corresponding to  $v_k$  in  $f$ , there must be an equivalent vector  $w$  in the embedding space of  $g$ .

$$\cos(\alpha_k) = \cos\text{-sim}(e(v_k, f, \mathcal{D}), e(w_k, g, \mathcal{D})) = \cos\text{-sim}(e(w, g, \mathcal{D}), e(w_k, g, \mathcal{D}))$$

Denote the matrix of vectors embedded using  $g$  by  $G = [g(\mathbf{x}_1), g(\mathbf{x}_2), \dots, G(\mathbf{x}_N)]^T$  a  $N \times D$  matrix ( $D$  is the dimension of  $g$  embeddings). Let  $U$  be a matrix with  $S$  basis vectors of size  $S \times D$ . We can express each vector as a combination of basis vectors and therefore  $G = AU$  for a  $N \times S$  matrix  $A$ .

Substituting the terms in the cos-sim expression, we have:

$$\begin{aligned} \cos(\alpha_k) &= \cos\text{-sim}(Gw, Gw_k) = \cos\text{-sim}(AUw, AUw_k) \\ &= \frac{w^T U^T A^T AUw_k}{\sqrt{(w^T U^T A^T AUw)(w_k^T U^T A^T AUw_k)}}. \end{aligned}$$

If the examples in  $\mathcal{D}$  are diversely distributed without any systematic bias,  $A^T A$  is proportional to the identity matrix, meaning the basis of  $G$  and  $W$  are effectively the same. We therefore have  $\cos(\alpha_k) = \cos\text{-sim}(Gw, Gw_k) = \cos\text{-sim}(Uw, Uw_k)$ , i.e. the projection of  $w, w_k$  on the subspace spanned by the embeddings have  $\cos(\alpha_k)$  cosine similarity. Since  $w, w_k$  are two vectors that are  $\alpha_k$  apart, an arbitrary new example  $\mathbf{x}$  that is at an angle of  $\theta$  from  $w_k$  is at an angle of  $\theta \pm \alpha_k$  from  $w$ . The cosine similarity follows as below.

$$\begin{aligned} \cos(\theta) = \cos\text{-sim}(w_k, g(\mathbf{x})) &\implies \cos\text{-sim}(w, g(\mathbf{x})) = \cos(\theta \pm \alpha_k) \\ &= \cos(\theta) \cos(\alpha_k) \pm \sin(\theta) \sin(\alpha_k) \end{aligned}$$

Because  $w$  is a vector in  $g$  corresponding to  $v_k$  in  $f$ ,  $\cos\text{-sim}(w, g(\mathbf{x})) = \cos\text{-sim}(v_k, f(\mathbf{x}))$ .  $\square$

## C PROOF OF PROPOSITION 2

The concept importance estimated by U-ACE when the input dimension is sufficiently large and for some  $\lambda > 0$  is approximately given by  $v_k = \frac{\mathbf{u}_k^T \mathbf{w}}{\mathbf{u}_k^T \mathbf{u}_k + \lambda \sigma_k^2}$ . On the other hand, the importance scores estimated using vanilla linear estimator under the same conditions is distributed as  $v_k \sim \mathcal{N}(\frac{\mathbf{u}_k^T \mathbf{w}}{\mathbf{u}_k^T \mathbf{u}_k}, \sigma_k^2 \frac{\|w\|^2}{\|u_k\|^2})$ .

*Proof.* We use the known result that inner product of two random vectors is close to 0 when the number of dimensions is large, i.e.  $u_i^T u_j \approx 0, i \neq j$ .

**Result with vanilla estimator.** We first show the solution using vanilla estimator is distributed as given by the result above. We wish to estimate  $v_1, v_2, \dots$  such that we approximate the prediction of model-to-be-explained:  $y = w^T \mathbf{x}$ . We denote by  $w_k$  sampled from the normal distributin of concept vectors. We require  $w^T \mathbf{x} \approx \sum_k v_k w_k^T \mathbf{x}$ . In effect, we are optimising for  $v$ s such that  $\|w - \sum_k v_k w_k\|^2$  is minimized. We multiply the objective by  $u_k$  and use the result that random vectors are almost orthogonal in high-dimensions to arrive at objective  $\arg \min_{v_k} \|w_k^T w - v_k (w_k^T w_k)\|$ . Which is minimized trivially when  $v_k = \frac{w_k^T w}{\|w_k\|^2}$ . Since  $w_k$  is normally distributed with  $\mathcal{N}(u_k, \sigma_k^2 I)$ ,  $w_k^T w = (u_k + \epsilon)^T w$ ,  $\epsilon \sim \mathcal{N}(0, I)$  is also normally distributed with  $\mathcal{N}(u_k^T w, \sigma_k^2 \|w\|^2)$ . We approximate the denominator with its average and ignoring its variance, i.e.  $\|w_k\|^2 = \mathcal{N}(\|u_k\|^2, \sigma_k^2) \approx \|u_k\|^2$  which is when  $\|u_k\|^2 \gg \sigma^2$ . We therefore have the result on distribution of  $v_k$ .

**Using U-ACE.** Similar to vanilla estimator, U-ACE optimizes  $v_k$  using the following objective.

$$\ell = \arg \min_v \{ \|w - \sum_k v_k u_k\|^2 + \lambda \sum_k \sigma_k^2 v_k^2 \}$$

setting  $\frac{\partial \ell}{\partial v_k} = 0$  and using almost zero inner product result above, we have

$$\begin{aligned} -u_k^T (w - \sum_j v_j u_j) + \lambda \sigma_k^2 v_k &= 0 \\ \implies v_k &= \frac{u_k^T w}{\|u_k\|^2 + \lambda \sigma_k^2} \end{aligned}$$

□

## D PROOF OF PROPOSITION 3

The importance score, denoted  $v_1, v_2$ , estimated by U-ACE are bounded from above by  $\frac{1}{N\lambda}$ , i.e.  $v_1, v_2 = \mathcal{O}(1/N\lambda)$  where  $\lambda > 0$  is a regularizing hyperparameter and N the number of examples.

*Proof.* We first show that the values of  $v_1, v_2$  in closed form are as below before we derive the final result.

$$\begin{aligned} v_1 &= \frac{\frac{S_1}{S_2} (1 - \beta_2)^2}{\frac{S_1}{S_2} (\beta_2^2 (1 - \beta_1)^2 + \beta_1^2 (1 - \beta_2)^2) + \lambda (1 - \beta_1) (1 - \beta_2)} \\ v_2 &= \frac{\frac{S_1}{S_2} (1 - \beta_1)^2}{\frac{S_1}{S_2} (\beta_1^2 (1 - \beta_2)^2 + \beta_2^2 (1 - \beta_1)^2) + \lambda (1 - \beta_1) (1 - \beta_2)} \end{aligned}$$

where  $S_1 = \sum_i y_i$ ,  $S_2 = \sum_i y_i^2$  and  $\lambda > 0$  is a regularizing hyperparameter.

We then observe that if  $\mathbf{x}$  is normally distributed then  $y = w^T \mathbf{x}$  is also normally distributed with the value of  $\frac{S_1}{S_2}$  is of the order  $\mathcal{O}(1/N)$ . Since  $\beta_1, \beta_2$  are very close to 0, we can approximate the expression for  $v_1$  as below.

$$v_1 \approx \frac{S_1}{S_2} (1 - \beta_2)^2 \frac{1}{\lambda (1 - \beta_1) (1 - \beta_2)} = \mathcal{O}(1/N\lambda)$$

□

---

### Importance scores from a standard estimator.

When  $c_1^{(1)} = (\beta_1 u + (1 - \beta_1)v)^T z^{(i)}$ ,  $c_2^{(i)} = (\beta_2 u + (1 - \beta_2)v)^T z^{(i)}$

we can estimate

$$\frac{(1 - \beta_2)c_1 - (1 - \beta_1)c_2}{(1 - \beta_2)\beta_1 - (1 - \beta_1)\beta_2} = \frac{(1 - \beta_2)c_1 - (1 - \beta_1)c_2}{\beta_1 - \beta_2} = u^T z_i = y_i$$

$$\frac{1 - \beta_2}{\beta_1 - \beta_2}, \frac{1 - \beta_1}{\beta_1 - \beta_2}$$

## E ADDITIONAL EXPERIMENT DETAILS

### List of fruit concepts from Section 4.1.

### List of animal concepts from Section 4.2.

### Scene labels considered in Section 4.3.

/a/arena/hockey, /a/auto\_showroom, /b/bedroom, /c/conference\_room, /c/corn\_field  
/h/hardware\_store, /l/legislative\_chamber, /t/tree\_farm, /c/coast,  
/p/parking\_lot, /p/pasture, /p/patio, /f/farm, /p/playground, /f/field/wild  
/p/playroom, /f/forest\_path, /g/garage/indoor  
/g/garage/outdoor, /r/runway, /h/harbor, /h/highway  
/b/beach, /h/home\_office, /h/home\_theater, /s/slum,  
/b/berth, /s/stable, /b/boat\_deck, /b/bow\_window/indoor,  
/s/street, /s/subway\_station/platform, /b/bus\_station/indoor, /t/television\_room,  
/k/kennel/outdoor, /c/campsite, /l/lawn, /t/tundra, /l/living\_room,  
/l/loading\_dock, /m/marsh, /w/waiting\_room, /c/computer\_room,  
/w/watering\_hole, /y/yard, /n/nursery, /o/office, /d/dining\_room, /d/dorm\_room,  
/d/driveway

#### E.1 ADDITION RESULTS FOR SECTION 4.3

We report also the tau (Wikipedia, 2023) distance from concept explanations computed by *Simple* as a measure of explanation quality. Kendall Tau is a standard measure for measuring distance between two ranked lists. It does so by computing number of pairs with reversed order between any two lists. Since *Simple* can only estimate the importance of concepts that are correctly annotated in the dataset, we restrict the comparison to only over concepts that are attributed non-zero importance by *Simple*.

| Dataset↓ | TCAV | O-CBM | Y-CBM | U-ACE       |
|----------|------|-------|-------|-------------|
| ADE20K   | 0.36 | 0.48  | 0.48  | <b>0.34</b> |
| PASCAL   | 0.46 | 0.52  | 0.52  | <b>0.32</b> |

Table 3: *Quality of explanation comparison.* Kendall Tau Distance between concept importance rankings computed using different explanation methods shown in the first row with ground-truth. The ranking distance is averaged over twenty labels. U-ACE is better than both Y-CBM and O-CBM as well as TCAV despite not having access to ground-truth concept annotations.

## F EXTENSION OF SIMULATION STUDY

**Under-complete concept set.** We now generate concept explanations with concepts set to {“red or blue”, “blue or red”, “green or blue”, “blue or green”}. The concept “red or blue” is expected to be active for both red or blue colors, similarly for “blue or red” concept. Since all the concepts contain a color from each label, i.e. are active for both the labels, none of them must be useful for prediction. Yet, the importance scores estimated by Y-CBM and O-CBM shown in the Figure 4 table attribute significant importance. U-ACE avoids this problem as explained in Section 3.2 and attributes almost zero importance.

---

| Concept       | Y-CBM | O-CBM | U-ACE |
|---------------|-------|-------|-------|
| red or blue   | -75.4 | -1.8  | 0.1   |
| blue or red   | 21.9  | -1.9  | 0     |
| green or blue | -1.4  | 1.6   | 0     |
| blue or green | -23.1 | 1.6   | 0     |

Table 4: When the concept set is under-complete and contains only nuisance concepts, their estimated importance score must be 0.
